# Supplementary material for: A simple, low-cost CVD route to high-quality CH3NH3PbI3perovskite thin films
Source: Royal Society of Chemistry journal article supplement (doi:10.1039/c5ce01496d), 2015-01-01
Supplement: c5ce01496d1.pdf [file c5ce01496d1.pdf]

## A simple, low-cost CVD route to high quality $\text{CH}_3\text{NH}_3\text{PbI}_3$ perovskite thin films

Shuqun Chen,<sup>\*a</sup> Joe Briscoe<sup>a</sup>, Yi Shi<sup>b</sup>, Kan Chen<sup>a</sup>, Rory M. Wilson<sup>a</sup>, Steve Dunn<sup>a</sup> and Russell Binions<sup>\*a</sup>

<sup>a</sup> School of Engineering and Materials Science, Queen Mary University of London, London E1 4NS, UK. E-mail: r.binions@qmul.ac.uk; shuqun.chen@qmul.ac.uk

<sup>b</sup> Department of Chemistry, University College London, 20 Gordon Street, London WC1H 0AJ, UK.

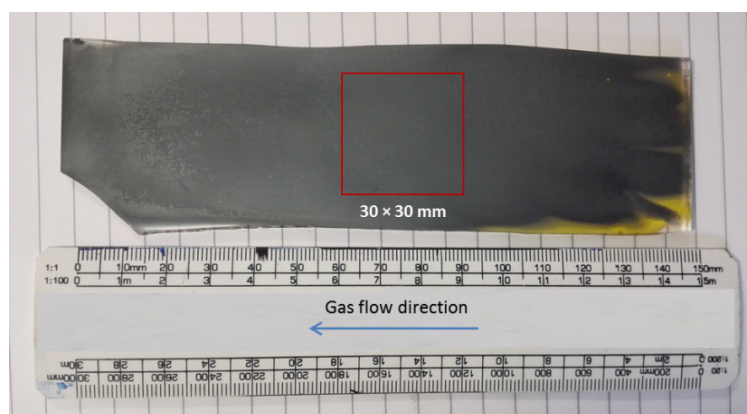

Fig. S1 Photograph showing large-area uniform  $\text{CH}_3\text{NH}_3\text{PbI}_3$  film grown by sequential AACVD on FTO glass substrate.

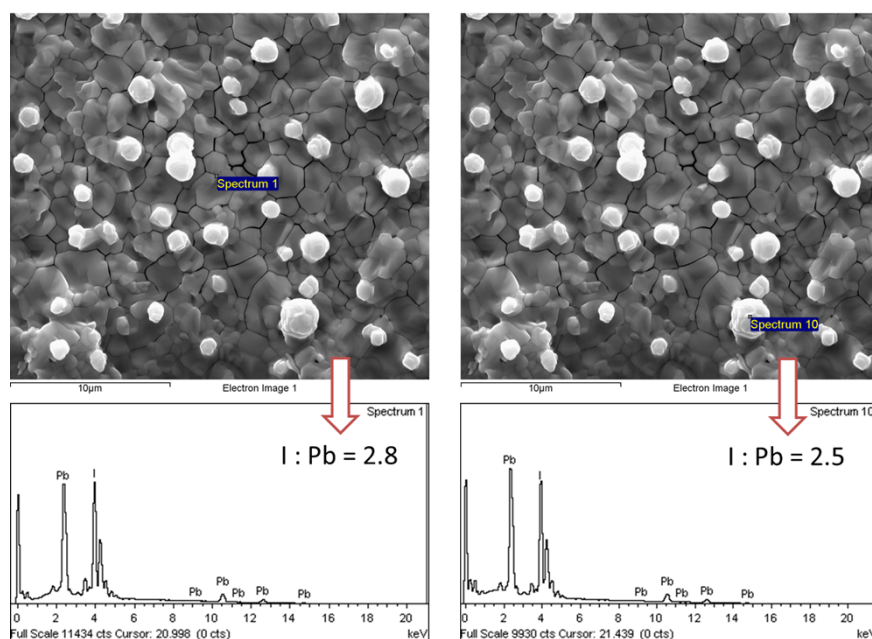

Fig. S2 SEM image and corresponding EDS spectra of AACVD  $\text{CH}_3\text{NH}_3\text{PbI}_3$  film on FTO glass.

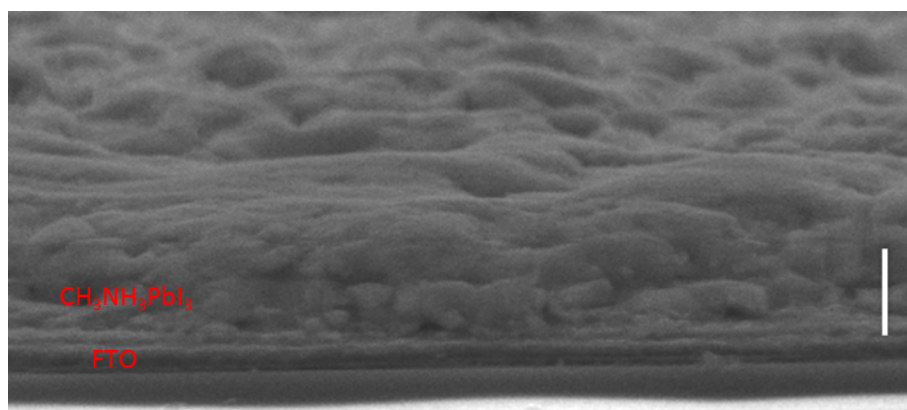

Fig. S3 Cross-section SEM image of AACVD  $\text{CH}_3\text{NH}_3\text{PbI}_3$  film on FTO glass. The error bar corresponds to 1.5  $\mu\text{m}$ .
